# Supplementary material
Source: PubMed Central journal article supplement (PMC2657741)
Supplement: rsbl20080469s22.pdf [file rsbl20080469s22.pdf]

**Electronic Appendix to the Manuscript****“Why are there so few smart mammals (but so many smart birds)?”****by Karin Isler and Carel P. van Schaik****Contents**

|                                                                                                     |       |
|-----------------------------------------------------------------------------------------------------|-------|
| <u>Material and Methods</u>                                                                         | p. 1  |
| Overview                                                                                            | p. 1  |
| Mammals                                                                                             | p. 2  |
| Birds                                                                                               | p. 3  |
| <u>Bivariate least-squares regressions of <math>r_{\max}</math> on brain mass and body mass</u>     | p. 5  |
| <u>Are our results a statistical artefact?</u>                                                      | p. 6  |
| <u>Which aspects of life history are associated with both brain size and <math>r_{\max}</math>?</u> | p. 8  |
| Correlations between components of $r_{\max}$                                                       | p. 8  |
| Correlations between brain mass and components of $r_{\max}$                                        | p. 10 |
| Conclusions                                                                                         | p. 10 |
| <u>Distribution of large-brained taxa in mammals and birds: retention indices</u>                   | p. 11 |
| <u>References</u>                                                                                   | p. 12 |

**Material and methods****Overview**

Data on fertility rates (total number of offspring produced per year), age of first reproduction (age at first conception) and maximum lifespan (both from field data or in captivity) were collected from the literature. From these data,  $r_{\max}$  was obtained by solving Cole's (1954) equation numerically (using Mathematica 5.0.1). Brain and body mass data was taken from our large compilation. In total, data on 536 eutherian mammals and 399 avian species have been compiled, but 11 bird species were excluded from analyses due to very low values of recorded maximum lifespan compared to congeneric species. All variables were  $\log_e$  transformed before analysis, and statistical tests were parametric, using JMP 5.0.2. As we are mainly interested in the significance of a relationship rather than in the value of the slope of the regression line, least-squares regressions were applied, although major axis regressions would give more appropriate estimations of the slope of the lines in interspecific datasets (Martin & Barbour, 1989).

In mammals, species were defined as precocial if the young open their eyes at birth or shortly thereafter. Most families of Chiroptera produce one single, large offspring after a long gestation, but this opens its eyes only after some days. Thus, all Chiroptera are omitted in the analyses where the data are split by development mode, but included in the analysis of the combined dataset. In birds, development modes were defined according to Ricklefs and Starck (1998): altricials, semi-altricials, semi-precocials and precocials.

To control for the effects of phylogenetic relationships, the method of calculating independent contrasts was applied using the PDAP:PDTree package (Garland et al., 1992; Garland et al., 1993) of the Mesquite computer program (Maddison & Maddison, 2007). Polytomies in the phylogeny were resolved arbitrarily to branches with length zero. Although this results in a slight overestimation of type I error rates (Purvis & Garland, 1993), in practice differences to the algorithm used in CAIC (Purvis & Rambaut, 1995) are negligible if the number of species in the tree is large. The regression lines were constrained to pass through the origin (Garland et al., 1992).

To analyse the distribution of relatively large-brained taxa across mammals and birds, residuals from a least-squares regression of brain mass vs. body mass were calculated. Discrete data were obtained by grouping these residuals according to percentiles. Then, retention indices of relative brain size of both mammals and birds were calculated in MacClade 4.07 (Maddison & Maddison, 2005).

## **Mammals:**

### Data:

We compiled a broad data set on average brain and body mass as well as annual fertility, age at reproductive maturity and maximum lifespan of eutherian mammals (1248 species). Life history data was taken from published compilations (Egoscue et al., 1970; Sacher & Staffeldt, 1974; Kingdon, 1977; Mace & Eisenberg, 1982; Swihart, 1984; Gittleman, 1986b; Lee et al., 1991; Hayssen et al., 1993; Silva & Downing, 1995; Nowak, 1999; Ross & Jones, 1999; Carey & Judge, 2000; Miller et al., 2002; Ernest, 2003; Wiese & Willis, 2004; Weigl, 2005). If data from several populations or subspecies was available, the median value was used as a species mean. In contrast to Ernest (2003), data sources were not pooled, as this can lead to inadvertent duplication of source values. Reaching adulthood was defined as the age at which first conception took place (age at first reproduction minus gestation length) and was taken for females only, if available. Brain size measurements were also compiled from various sources (Oboussier & Schliemann, 1966; Pirlot & Stephan,

1970; Mace et al., 1981; Stephan et al., 1981; Mace & Eisenberg, 1982; Hafner & Hafner, 1984; Bauchot, 1985; Pirlot & Kamiya, 1985; Gittleman, 1986a; Bernard & Nurton, 1993; Iwaniuk et al., 2001; Hutcheon et al., 2002; Mann & Towe, 2003; Isler et al., in press and G. Mace pers. comm.). They all came from fully adult skulls and represent the mean of male and female values. Both brain mass and cranial capacity have been used as measures of brain size. When brain size was expressed in volume, these values were multiplied by 1.036 g/ml (the density of fresh brain tissue, Stephan, 1960; in Rehkamper et al., 1991) to obtain brain mass estimates.

#### Phylogeny:

Taxonomy follows Groves (2005) for primates and Nowak (1999) for all other mammals. Phylogenetic relationships are those proposed by Bininda-Emonds et al. (2007), including branch lengths estimations.

#### **Birds:**

##### Data:

Data were assembled from the literature, building on a large dataset of bird brain masses compiled mainly by Mlikovsky (1989a; 1989b; 1989c; 1990) and Iwaniuk & Nelson (2003), together with species mean body mass given in these sources (1748 species). All brain weight measurements came from fully adult skulls. Values represent the mean of male and female weights (see Iwaniuk & Nelson, 2002). Both brain weight and brain volume have been used as measures of brain size. Although brain mass is most often used, volumetric measures are considered equally valid because bird brains almost completely fill the cavum cranii (Mlikovsky, 1989a) and comparisons between volumetric values and brain weights found no significant differences (Iwaniuk & Nelson, 2001; Iwaniuk & Nelson, 2002).

Life history data (age at first reproduction, maximum lifespan and annual fertility rate) was compiled from several sources (mainly Schönwetter, 1960-1978; del Hoyo et al., 1992-2004). Complete information was available for 399 species, but 11 species were excluded due to unlikely low estimates of maximum lifespan compared to congeneric species.

##### Phylogeny:

Taxonomy followed Sibley and Monroe (1990). Phylogenetic relationships are those proposed by Katie Davis and Rod Page, University of Glasgow (Davis, 2008). The bird supertree is based on a strict consensus of 2000 trees run in Paup and assembles information from 748 published phylogenetic trees (Davis, 2008). The

phylogeny and further details are available online (Bird Supertree Project, <http://linnaeus.zoology.gla.ac.uk/~rpage/birdsupertree/>). For 1541 species, both brain mass data and phylogenetic information was available. The analysis of the distribution of residuals of brain vs. body mass for bird families is based on this reduced dataset. Family averages were calculated from species means. For calculating the retention index, MacClade allows a maximum number of 1500 taxa. Thus, 41 taxa were omitted arbitrarily.

Because branch length was unavailable, we set all branch lengths equal to 1.0. Sensitivity analysis branch carried out by running all the analyses using three arbitrary methods (Grafen's, Pagel's and Nealen's method as described in Garland et al., 1999), demonstrated that the results did not depend upon which branch lengths were used. Consequently, we present the results based on branch lengths equal to 1.0, which was justified (absolute contrasts vs. square root of the sum of branch lengths: slopes not significantly different from zero for all variables, Garland et al., 1999).

As this supertree contains some ambiguities (Davis, 2008), we repeated all analyses also with a supertree based on Sibley and Ahlquist's DNA-DNA hybridisation data (Sibley et al., 1988), as well as on more recent molecular studies (Sheldon et al., 1992; Sheldon & Winkler, 1993; Livezey, 1995; Livezey, 1996; Bleiweiss et al., 1997; Cohen et al., 1997; Cibois & Pasquet, 1999; Cibois et al., 1999; Crochet et al., 2000; DeFilippis & Moore, 2000; Dimcheff et al., 2002; Donne-Goussé et al., 2002; Yuri & Mindell, 2002; Irestedt et al., 2004), also using equal branch lengths. However, the results did not differ from those of the Davis tree in their level of significance.

## Bivariate least-squares regressions of $r_{\max}$ on brain mass and body mass

**Table A1:** Bivariate least-squares regressions of  $r_{\max}$  in mammals and birds (ln  $r_{\max}$  as dependent variable, ln body mass or ln brain mass as independent variable). The higher correlation coefficient  $r^2$  is shown in bold face.

|                 |        |     | Brain mass   |         |        | Body mass    |         |        |
|-----------------|--------|-----|--------------|---------|--------|--------------|---------|--------|
|                 | method | N   | $r^2$        | p       | slope  | $r^2$        | p       | slope  |
| <b>Mammals</b>  |        |     |              |         |        |              |         |        |
| All species     | raw    | 536 | <b>0.563</b> | <0.0001 | -0.447 | 0.485        | <0.0001 | -0.310 |
|                 | IC     | 535 | <b>0.129</b> | <0.0001 | -0.349 | 0.094        | <0.0001 | -0.200 |
| Altricials      | raw    | 249 | <b>0.596</b> | <0.0001 | -0.488 | 0.584        | <0.0001 | -0.367 |
|                 | IC     | 248 | <b>0.115</b> | <0.0001 | -0.366 | 0.099        | <0.0001 | -0.213 |
| Precocials      | raw    | 256 | <b>0.439</b> | <0.0001 | -0.398 | 0.244        | <0.0001 | -0.198 |
|                 | IC     | 255 | <b>0.151</b> | <0.0001 | -0.344 | 0.078        | <0.0001 | -0.177 |
| Terrestrial     |        |     |              |         |        |              |         |        |
| Carnivora       | raw    | 98  | <b>0.477</b> | <0.0001 | -0.439 | 0.472        | <0.0001 | -0.286 |
|                 | IC     | 97  | <b>0.253</b> | <0.0001 | -0.418 | 0.150        | <0.0001 | -0.226 |
| Non-canid       |        |     |              |         |        |              |         |        |
| Carnivora       | raw    | 79  | <b>0.654</b> | <0.0001 | -0.495 | 0.581        | <0.0001 | -0.303 |
|                 | IC     | 78  | <b>0.337</b> | <0.0001 | -0.468 | 0.169        | <0.0001 | -0.229 |
| <b>Birds</b>    |        |     |              |         |        |              |         |        |
| All species     | raw    | 388 | <b>0.350</b> | <0.0001 | -0.364 | 0.308        | <0.0001 | -0.199 |
|                 | IC     | 387 | 0.102        | <0.0001 | -0.321 | <b>0.129</b> | <0.0001 | -0.213 |
| Altricials      | raw    | 137 | 0.461        | <0.0001 | -0.330 | <b>0.527</b> | <0.0001 | -0.233 |
|                 | IC     | 136 | <b>0.118</b> | <0.0001 | -0.209 | 0.114        | <0.0001 | -0.143 |
| Semi-altricials | raw    | 77  | 0.590        | <0.0001 | -0.671 | <b>0.669</b> | <0.0001 | -0.398 |
|                 | IC     | 76  | 0.157        | <0.0001 | -0.587 | <b>0.329</b> | <0.0001 | -0.400 |
| Semi-precocials | raw    | 42  | <b>0.075</b> | 0.079   | -0.208 | 0.027        | 0.302   | -0.082 |
|                 | IC     | 41  | <b>0.115</b> | 0.069   | -0.227 | 0.034        | 0.266   | -0.095 |
| Precocials      | raw    | 132 | <b>0.183</b> | <0.0001 | -0.241 | 0.121        | <0.0001 | -0.114 |
|                 | IC     | 131 | <b>0.145</b> | <0.0001 | -0.366 | 0.070        | <0.0001 | -0.171 |

### **Are our results a statistical artefact?**

The fact that the correlations for brain mass are generally stronger than for body mass may simply be because brain mass is actually a more accurate indicator of size than is body mass. Sacher (1959) found that lifespan is more closely correlated with brain mass than with body mass. Economos (1980), however, showed that this is also true for other internal organs such as the liver, suggesting that the stronger correlation between life histories and brain mass is due to the relatively great intra-specific variance in body mass rather than to any special link between life histories and the brain. Have we fallen into the same trap as, purportedly, Sacher (see also Harvey & Krebs, 1990)? Body mass is notoriously variable within species, and less variable organs (such as the brain) seem to provide a more reliable measure of size.

Unfortunately, this problem is not solved by the use of multiple regression. Still, it would be most unlikely that the observed patterns of correlation vary between groups of taxa exactly in the way predicted by the Expensive Brain framework, if the results were indeed due to a statistical artefact. For instance, why should brain mass not be a better predictor of body size in altricial birds, too? But a much stronger test is possible. If our results are indeed based on an artefact, the same general pattern should be found for other organs, such as the liver, the heart or muscle mass, which also tend to vary much less than body mass and may thus be a better estimate of actual body size. If, on the other hand, the  $r_{\max}$ -brain size correlation is biologically meaningful, other organ masses should not be negatively correlated with  $r_{\max}$ .

We have conducted analogous analyses using other organ masses instead of brain mass to predict  $r_{\max}$ . Data for mammals are taken from Crile & Quiring (1940), and pectoral muscle mass data for birds are taken from Magnan (1922) as listed in Viscor & Fuster (1987).

The results presented in Table A2 are fully consistent with our predictions. In mammals, only brain mass is significantly correlated with  $r_{\max}$ , whereas none of the other organs show any significant correlation at all. The results also hold if precocials and altricials are analyzed separately, although not always yielding significant results due to the smaller sample sizes.

In birds, the situation is more complex. We lack data on organ weights for a sufficiently large number of species. However, there are data on pectoral muscle mass, and we could show (Isler and van Schaik 2006) that there is a trade-off in the maintenance category in birds: species with relatively large brains have relatively small pectoral muscles and vice versa (probably due to the high energetic demands of flight). Thus, we would expect that in precocial birds,  $r_{\max}$  and pectoral muscle mass will be correlated through an indirect effect of brain mass on both variables.

**Table A2:** Multiple least-squares regressions of  $r_{\max}$  vs. various organ masses in mammals and birds (ln  $r_{\max}$  as dependent variable, ln body mass and, subsequently, ln of each organ mass as independent variables). For both body mass and organ mass, p-values and the correlation coefficient with  $r_{\max}$  are listed. As the observed correlation between  $r_{\max}$  and brain mass differs completely between altricial and precocial birds, those two development modes are analysed separately in birds. Significant effects are shown in bold face.

|                                  | N  | $r^2$ | Body mass         |               | Organ mass        |               |
|----------------------------------|----|-------|-------------------|---------------|-------------------|---------------|
|                                  |    |       | p                 | estimate      | p                 | estimate      |
| <b>Mammals</b>                   |    |       |                   |               |                   |               |
| Heart mass                       | 88 | 0.58  | <b>0.013</b>      | <b>-0.564</b> | 0.331             | +0.219        |
| Lung mass                        | 83 | 0.567 | 0.064             | -0.319        | 0.864             | -0.028        |
| Liver mass                       | 83 | 0.626 | <b>0.015</b>      | <b>-0.495</b> | 0.489             | +0.152        |
| Kidney mass                      | 79 | 0.627 | <b>0.029</b>      | <b>-0.385</b> | 0.887             | +0.028        |
| Brain mass                       | 87 | 0.716 | <b>0.005</b>      | <b>0.298</b>  | <b>&lt;0.0001</b> | <b>-0.944</b> |
| <b>Birds (precocial)</b>         |    |       |                   |               |                   |               |
| Pectoral muscle mass             | 58 | 0.162 | <b>0.015</b>      | <b>-0.523</b> | 0.069             | +0.407        |
| Brain mass (for the same sample) | 57 | 0.243 | 0.188             | +0.248        | <b>0.021</b>      | <b>-0.753</b> |
| <b>Birds (altricial)</b>         |    |       |                   |               |                   |               |
| Pectoral muscle mass             | 53 | 0.682 | <b>&lt;0.0001</b> | <b>-0.711</b> | <b>0.002</b>      | <b>+0.482</b> |
| Brain mass (for the same sample) | 52 | 0.621 | 0.057             | -0.159        | 0.324             | -0.122        |

This is, indeed, found in our sample, although the correlation is just shy of significance ( $p=0.069$ , Table A2). Relatively large-brained precocial birds exhibit a relatively low  $r_{\max}$  (and, at the same time, relatively small pectoral muscles). Thus, the (positive) correlation between  $r_{\max}$  and pectoral muscle does not arise because pectoral muscle mass is a better estimator of body size than body mass, but because of the energy trade-off between its size and that of the brain.

In altricial birds, on the other hand, as  $r_{\max}$  and brain mass are not correlated, we would only expect a significant effect of pectoral muscle mass on  $r_{\max}$ , if pectoral muscle mass is a better estimate of body size than body mass itself. In this case, the correlation between  $r_{\max}$  and pectoral muscle mass should be negative, while the effect of body mass on  $r_{\max}$  should disappear or become positive. However, we observe a significantly positive correlation between pectoral muscle mass and  $r_{\max}$ ,

and the negative effect of body mass on  $r_{\max}$  is maintained (Table A2). In other words, altricial bird species with relatively large pectoral muscles for their body mass exhibit an increased reproductive capacity as proxied by  $r_{\max}$ , independent of their brain size. It is beyond the scope of the present paper to interpret this interesting result, but regardless, in altricial birds as in precocial ones, pectoral muscle mass is not a better predictor of body size than body mass itself. Thus, we conclude that the relationships between brain size and  $r_{\max}$  obtained here are biologically meaningful and do not originate from a statistical artefact.

### Which aspects of life history are associated with both brain size and $r_{\max}$ ?

The maximum rate of population increase (also termed „intrinsic rate of natural increase“, e.g. Ross 1992),  $r_{\max}$ , is defined by Cole’s equation (21) in Cole (1954):

$$1 = e^{-r} + b(e^{-r \cdot \alpha} - e^{-r(\omega+1)})$$

with  $b$  = annual fecundity,  $\alpha$  = minimum age at first reproduction (AFR) and  $\omega$  = maximum age at last reproduction. Here, we use fertility (=  $2 \cdot b$ ) and maximum lifespan as  $\omega$  (except for humans, where  $\omega = 45$ y (Hill & Hurtado 1996)).

Additionally, we define the maximum reproductive period (MaxRP) as max. lifespan minus AFR. Sample sizes are given in Table A3.

**Table A3:** Sample sizes (number of species).

| Mammals    |            | Birds      |            |
|------------|------------|------------|------------|
| Altricials | Precocials | Altricials | Precocials |
| 249        | 256        | 142        | 127        |

### Correlations between components of $r_{\max}$

All life history traits that contribute to  $r_{\max}$  are highly correlated with each other (after partialling out body mass), except maximum lifespan and fertility in altricial birds (Table A4). From the definition, we expect that fertility and maximum lifespan, as well as maximum reproductive period are positively correlated with  $r_{\max}$ , whereas age at first reproduction is negatively correlated with  $r_{\max}$ .



**Table A4:** Pairwise correlations between components of  $r_{\max}$  (AFR, max. lifespan and fertility), partialling out body mass.

|                          | <b>Altricials</b> |          | <b>Precocials</b> |          |
|--------------------------|-------------------|----------|-------------------|----------|
|                          | <b>r</b>          | <b>p</b> | <b>r</b>          | <b>p</b> |
| <b>Mammals</b>           |                   |          |                   |          |
| AFR – max lifespan       | 0.230             | 0.0003   | 0.789             | <0.0001  |
| AFR – fertility          | -0.485            | <0.0001  | -0.772            | <0.0001  |
| Max lifespan – fertility | -0.287            | <0.0001  | -0.671            | <0.0001  |
| <b>Birds</b>             |                   |          |                   |          |
| AFR – max lifespan       | 0.190             | 0.024    | 0.325             | 0.0002   |
| AFR – fertility          | -0.490            | <0.0001  | -0.573            | <0.0001  |
| Max lifespan – fertility | -0.024            | 0.778    | -0.407            | <0.0001  |

In all groups the partial correlation between maximum lifespan and  $r_{\max}$  is weak as compared to the other two variables (Table A5). In altricial mammals, maximum lifespan is even significantly negatively correlated with  $r_{\max}$ . In all groups, MaxRP is not positively correlated with  $r_{\max}$  if fertility is partialled out (Table 2A in the main text). In precocial mammals, MaxRP is even significantly negatively correlated with  $r_{\max}$ .

**Table A5:** Partial correlations between  $r_{\max}$  and its components (AFR, max. lifespan and fertility), partialling out body mass and the other two life history variables.

|                | <b>Altricials</b> |          | <b>Precocials</b> |          |
|----------------|-------------------|----------|-------------------|----------|
|                | <b>r</b>          | <b>p</b> | <b>r</b>          | <b>p</b> |
| <b>Mammals</b> |                   |          |                   |          |
| AFR            | -0.975            | <0.0001  | -0.902            | <0.0001  |
| Max lifespan   | -0.158            | 0.013    | 0.195             | 0.002    |
| Fertility      | 0.931             | <0.0001  | 0.948             | <0.0001  |
| <b>Birds</b>   |                   |          |                   |          |
| AFR            | -0.982            | <0.0001  | -0.994            | <0.0001  |
| Max lifespan   | 0.191             | 0.025    | 0.037             | 0.682    |
| Fertility      | 0.987             | <0.0001  | 0.993             | <0.0001  |

### Correlations between brain mass and components of $r_{\max}$

Life history traits that contribute to  $r_{\max}$  are mostly correlated with brain mass (even when body mass is partialled out), but not in altricial birds (Table A6). Note that, as a weak trend, fertility is even positively correlated with brain mass in the latter group. AFR is not correlated with brain mass in altricial mammals (cf. Isler & van Schaik, in review: The lengths of development periods are not correlated with brain size in altricial mammals).

**Table A6:** Pairwise correlation coefficients between brain mass and components of  $r_{\max}$  (AFR, max lifespan and fertility), partialling out body mass.

|                | Altricials |         | Precocials |         |
|----------------|------------|---------|------------|---------|
|                | r          | p       | r          | p       |
| <b>Mammals</b> |            |         |            |         |
| AFR            | 0.092      | 0.147   | 0.650      | <0.0001 |
| Max lifespan   | 0.326      | <0.0001 | 0.517      | <0.0001 |
| Fertility      | -0.238     | 0.0002  | -0.698     | 0.0002  |
| <b>Birds</b>   |            |         |            |         |
| AFR            | 0.103      | 0.224   | 0.393      | <0.0001 |
| Max lifespan   | 0.076      | 0.372   | 0.341      | <0.0001 |
| Fertility      | 0.121      | 0.154   | -0.324     | 0.0002  |

If not only body mass, but all life history variables are partialled out simultaneously, in each precocial group a different variable is no longer significantly correlated with brain mass (Table A7, next page): maximum lifespan in precocial mammals, fertility in precocial birds. To clarify the patterns, we look at partial correlations between MaxRP, fertility and brain mass (as usual also partialling out body mass). Table 2B in the main text shows that fertility rate is negatively correlated with brain mass in three groups (all except altricial birds), while MaxRP is positively correlated with brain mass only in altricial mammals and precocial birds.

### Conclusion

In both altricial and precocial mammals, as well as in precocial birds, the negative correlation between  $r_{\max}$  and brain size can mostly be attributed to the influence of fertility rate. The absence of a correlation in altricial birds can also be attributed to fertility rate, which is not negatively, but even positively correlated with brain mass (controlling for body mass, as a weak trend).

**Table A7:** Partial correlation coefficients between brain mass and components of  $r_{\max}$  (AFR, Max lifespan and fertility), partialling out body mass and the other two life history variables.

|                | <b>Altricials</b> |          | <b>Precocials</b> |          |
|----------------|-------------------|----------|-------------------|----------|
|                | <b>r</b>          | <b>p</b> | <b>r</b>          | <b>p</b> |
| <b>Mammals</b> |                   |          |                   |          |
| AFR            | -0.060            | 0.349    | 0.230             | 0.0002   |
| Max lifespan   | 0.281             | <0.0001  | -0.035            | 0.580    |
| Fertility      | -0.169            | 0.008    | -0.405            | <0.0001  |
| <b>Birds</b>   |                   |          |                   |          |
| AFR            | 0.139             | 0.103    | 0.247             | 0.006    |
| Max lifespan   | 0.052             | 0.546    | 0.219             | 0.015    |
| Fertility      | 0.162             | 0.058    | -0.066            | 0.464    |

### **Distribution of large-brained taxa in mammals and birds: retention indices**

**Table A8:** Retention indices (RI) for relatively large brain size in mammals (N=1231) and birds (N=1500). Groups are based on percentiles of residuals of least-squares regressions of brain mass vs. body mass.

|         | <b>Upper 10% of residuals</b> |           | <b>Upper 15% of residuals</b> |           |
|---------|-------------------------------|-----------|-------------------------------|-----------|
|         | <b>Steps</b>                  | <b>RI</b> | <b>Steps</b>                  | <b>RI</b> |
| Mammals | 38                            | 0.70      | 54                            | 0.71      |
| Birds   | 59                            | 0.61      | 85                            | 0.63      |

## References

- Bauchot, R. 1985 The encephalization in the carnivores and the artiodactyls. *Mammalia* 49, 559-572.
- Bernard, R. T. F. & Nurton, J. 1993 Ecological correlates of relative brain size in some South-African rodents. *South African Journal of Zoology* 28, 95-98.
- Bininda-Emonds, O. R. P., Cardillo, M., Jones, K. E., MacPhee, R. D. E., Beck, R. M. D., Grenyer, R., Price, S. A., Vos, R. A., Gittleman, J. L. & Purvis, A. 2007 The delayed rise of present-day mammals. *Nature* 446, 507-512.
- Bleiweiss, R., Kirsch, J. A. W. & Matheus, J. C. 1997 DNA hybridization evidence for the principal lineages of hummingbirds (Aves: Trochilidae). *Molecular Biology and Evolution* 14, 325-343.
- Carey, J. R. & Judge, D. S. 2000 *Longevity Records: Life Spans of Mammals, Birds, Amphibians, Reptiles, and Fish*. Odense: Odense University Press.
- Cibois, A. & Pasquet, E. 1999 Molecular analysis of the phylogeny of 11 genera of the Corvidae. *Ibis* 141, 297-306.
- Cibois, A., Pasquet, E. & Schulenberg, T. S. 1999 Molecular systematics of the Malagasy babblers (Passeriformes : Timaliidae) and warblers (Passeriformes : Sylviidae), based on cytochrome b and 16S rRNA sequences. *Molecular Phylogenetics and Evolution* 13, 581-595.
- Cohen, B. L., Baker, A. J., Bleschschmidt, K., Dittmann, D. L., Furness, R. W., Gerwin, J. A., Helbig, A. J., DeKorte, J., Marshall, H. D., Palma, R. L., Peter, H. U., Ramli, R., Siebold, I., Willcox, M. S., Wilson, R. H. & Zink, R. M. 1997 Enigmatic phylogeny of skuas (Aves: Stercorariidae). *Proceedings of the Royal Society of London Series B-Biological Sciences* 264, 181-190.
- Cole, L. 1954 The population consequences of life-history phenomena. *Quarterly Review of Biology* 29:103-137.
- Crile, G.W. & Quiring, D. P. 1940 A record of the body weights and certain organ and gland weights of 3690 animals. *Ohio Journal of Science* 40:219-259.
- Crochet, P.-A., Bonhomme, F. & Lebreton, J.-D. 2000 Molecular phylogeny and plumage evolution in gulls (Larini). *Journal of Evolutionary Biology* 13, 47-57.
- Davis, K. E., 2008. *Reweaving the Tapestry: A Supertree of Birds*. PhD thesis, Glasgow University, Glasgow, UK.
- DeFilippis, V. R. & Moore, W. S. 2000 Resolution of phylogenetic relationships among recently evolved species as a function of amount of DNA sequence:

- An empirical study based on woodpeckers (Aves: Picidae). *Molecular Phylogenetics and Evolution* 16, 143-160.
- del Hoyo, J., Elliott, J. & Sargatal, J. eds. 1992-2004. *Handbook of the Birds of the World*. Barcelona: Lynx Editions.
- Dimcheff, D. E., Drovetski, S. V. & Mindell, D. P. 2002 Phylogeny of Tetraoninae and other galliform birds using mitochondrial 12S and ND2 genes. *Molecular Phylogenetics and Evolution* 24, 203-215.
- Donne-Goussé, C., Laudet, V. & Hänni, C. 2002 A molecular phylogeny of anseriformes based on mitochondrial DNA analysis. *Molecular Phylogenetics and Evolution* 23, 339-356.
- Economos, A. C. 1980 Taxonomic differences in the mammalian life span-body weight relationship and the problem of brain weight. *Gerontology* 26:90-98.
- Egoscue, H. J., Bittmenn, J. G. & Petrovic, J. A. 1970 Some fecundity and longevity records for captive small mammals. *Journal of Mammalogy* 51, 622-623.
- Ernest, S. K. M. 2003 Life history characteristics of placental nonvolant mammals. *Ecology* 84, 3402-3402.
- Garland, T., Dickerman, A. W., Janis, C. M. & Jones, J. A. 1993 Phylogenetic analysis of covariance by computer simulation. *Systematic Biology* 42, 265-292.
- Garland, T., Harvey, P. H. & Ives, A. R. 1992 Procedures for the analysis of comparative data using phylogenetically independent contrasts. *Systematic Biology* 41, 18-32.
- Garland, T., Midford, P. E. & Ives, A. R. 1999 An introduction to phylogenetically based statistical methods, with a new method for confidence intervals on ancestral values. *American Zoologist* 39, 374-388.
- Gittleman, J. L. 1986a Carnivore brain size, behavioral ecology, and phylogeny. *Journal of Mammalogy* 67, 23-36.
- Gittleman, J. L. 1986b Carnivore life-history patterns - allometric, phylogenetic, and ecological associations. *American Naturalist* 127, 744-771.
- Groves, C. P. 2005 Order Primates. In *Mammal Species of the World: A Taxonomic and Geographic Reference. 3rd Edition* eds. D. E. Wilson & D. M. Reader), pp. 111-184. Baltimore: Johns Hopkins University Press.
- Hafner, M. S. & Hafner, J. C. 1984 Brain size, adaptation, and heterochrony in geomyoid rodents. *Evolution* 38, 1088-1098.
- Harvey, P. H. & Krebs, J. R. 1990 Comparing brains. *Science* 249:140-146.

- Hayssen, V., van Tienhoven, A. & van Tienhoven, A. 1993 *Asdell's patterns of mammalian reproduction: a compendium of species-specific data*. Ithaca: Comstock/Cornell University Press.
- Hill, K. & Hurtado, A. M. 1996 *Ache Life history: The Ecology and Demography of a Foraging People*. Hawthorne, NY: Aldine de Gruyter.
- Hutcheon, J. M., Kirsch, J. W. & Garland, T. 2002 A comparative analysis of brain size in relation to foraging ecology and phylogeny in the chiroptera. *Brain, Behavior and Evolution* 60, 165-180.
- Irestedt, M., Fjeldsa, J., Nylander, J. A. A. & Ericson, P. G. P. 2004 Phylogenetic relationships of typical antbirds (Thamnophilidae) and test of incongruence based on Bayes factors. *BMC Evolutionary Biology* 4, art. no. 23.
- Isler, K., Kirk, E. C., Miller, J. M. A., Albrecht, G. A., Gelvin, B. R. & Martin, R. D. in press Endocranial volumes of primate species. Scaling analyses using a comprehensive and reliable dataset. *Journal of Human Evolution* doi:10.1016/j.jhevol.2008.08.004
- Isler, K. & van Schaik, C. P. 2006 Costs of encephalisation: the energy trade-off hypothesis tested on birds. *Journal of Human Evolution* 51:228-243.
- Isler, K. & van Schaik, C. P. in review The Expensive Brain: a framework for explaining evolutionary changes in brain size. *Journal of Human Evolution*.
- Iwaniuk, A. & Nelson, J. 2001 A comparative analysis of relative brain size in Waterfowl (Anseriformes). *Brain, Behavior and Evolution* 57, 87-97.
- Iwaniuk, A. & Nelson, J. 2002 Can endocranial volume be used as an estimate of brain size in birds? *Canadian Journal of Zoology* 80, 16-23.
- Iwaniuk, A. N. & Nelson, J. E. 2003 Developmental differences are correlated with relative brain size in birds: a comparative analysis. *Canadian Journal of Zoology* 81, 1913-1928.
- Iwaniuk, A. N., Nelson, J. E. & Pellis, S. M. 2001 Do big-brained animals play more? Comparative analyses of play and relative brain size in mammals. *Journal of Comparative Psychology* 115, 29-41.
- Kingdon, J. 1977 *East African Mammals. An Atlas of Evolution in Africa. Vol. III Part A*. New York: Academic Press.
- Lee, P. C., Majluf, P. & Gordon, I. J. 1991 Growth, weaning and maternal investment from a comparative perspective. *Journal of Zoology* 225, 99-114.
- Livezey, B. C. 1995 Phylogeny and evolutionary ecology of modern seaducks (Anatidae: Mergini). *Condor* 97, 233-255.
- Livezey, B. C. 1996 A phylogenetic analysis of modern pochards (Anatidae: Aythyini). *Auk* 113, 74-93.

- Mace, G. M. & Eisenberg, J. F. 1982 Competition, niche specialization and the evolution of brain size in the genus *Peromyscus*. *Biological Journal of the Linnean Society* 17, 243-257.
- Mace, G. M., Harvey, P. H. & Cluttonbrock, T. H. 1981 Brain size and ecology in small mammals. *Journal of Zoology* 193, 333-354.
- Maddison, D. R. & Maddison, W. P. 2005 MacClade. Version 4.07. <http://macclade.org>.
- Maddison, D. R. & Maddison, W. P. 2007 Mesquite: A modular system for evolutionary analysis. Version 2.01. <http://mesquiteproject.org>.
- Magnan, A. 1922 Les caractéristiques des oiseaux suivant le mode de vol. *Annales des Sciences Naturelles - Zoologie et Biologie Animale* 10:125-334.
- Mann, M. & Towe, A. 2003 Brain-body size relations in grasshopper mice. *Brain, Behavior and Evolution* 62, 13-18.
- Martin, R. D. & Barbour, A. D. 1989 Aspects of line-fitting in bivariate allometric analyses. *Folia Primatologica* 53, 65-81.
- Miller, R. A., Harper, J. M., Dysko, R. C., Durkee, S. J. & Austad, S. N. 2002 Longer life spans and delayed maturation in wild-derived mice. *Experimental Biology and Medicine* 227, 500-508.
- Mlikovsky, J. 1989a Brain size in birds: 1. Tinamiformes through Ciconiformes. *Acta Societatis Zoologicae Bohemoslovenicae* 53, 33-47.
- Mlikovsky, J. 1989b Brain size in birds: 2. Falconiformes through Gaviiformes. *Acta Societatis Zoologicae Bohemoslovenicae* 53, 200-213.
- Mlikovsky, J. 1989c Brain size in birds: 3. Columbiformes through Piciformes. *Acta Societatis Zoologicae Bohemoslovenicae* 53, 252-264.
- Mlikovsky, J. 1990 Brain size in birds: 4. Passeriformes. *Acta Societatis Zoologicae Bohemoslovenicae* 54, 27-37.
- Nowak, R. 1999 *Walker's Mammals of the World*. Baltimore and London: Johns Hopkins University Press.
- Oboussier, H. & Schliemann, H. 1966 Hirn- und Körpergewichtsbeziehungen bei Boviden. *Zeitschrift für Säugetierkunde* 31, 464-471.
- Pirlot, P. & Kamiya, T. 1985 Qualitative and quantitative brain morphology in the sirenian dugong (*Dugong erxl*). *Zeitschrift für Zoologische Systematik und Evolutionsforschung* 23, 147-155.
- Pirlot, P. & Stephan, H. 1970 Encephalization in Chiroptera. *Canadian Journal of Zoology* 48, 433-444.
- Purvis, A. & Garland, T. 1993 Polytomies in comparative analyses of continuous characters. *Systematic Biology* 42, 569-575.

- Purvis, A. & Rambaut, A. 1995 Comparative analysis by independent contrasts (CAIC): an Apple Macintosh application for analysing comparative data. *Computer Applications in the Biosciences* 11, 247-251.
- Rehkamper, G., Frahm, H. D. & Zilles, K. 1991 Quantitative development of brain and brain structures in birds (Galliformes and Passeriformes) compared to that in mammals (Insectivores and Primates). *Brain, Behavior and Evolution* 37, 125-143.
- Ricklefs, R. & Starck, J. 1998 The evolution of the developmental mode in birds. In *Avian Growth and Development: Evolution Within the Altricial-Precocial Spectrum* (eds. J. Starck & R. Ricklefs), pp. 366-380. Oxford: Oxford University Press.
- Ross, C. 1992 Environmental correlates of the intrinsic rate of natural increase in primates. *Oecologia* 90:383-390.
- Ross, C. & Jones, K. 1999 Socioecology and the evolution of primate reproductive rates. In *Comparative Primate Socioecology* (ed. P. Lee), pp. 73-110. Cambridge: Cambridge University Press.
- Sacher, G. 1959 Relation of lifespan to brain weight and body weight in mammals. In *The Lifespan of Animals* (eds. G. E. W. Wolstenholme & M. O'Connor), pp. 115-133. London: Churchill.
- Sacher, G. & Staffeldt, E. 1974 Relation of gestation time to brain weight for placental mammals: Implications for the theory of vertebrate growth. *American Naturalist* 108, 593-615.
- Schönwetter, M. 1960-1978 *Handbuch der Oologie*. Berlin: Akademie Verlag.
- Sheldon, B. C. & Winkler, D. W. 1993 Intergeneric phylogenetic relationships of swallows estimated by DNA-DNA hybridization. *Auk* 110, 798-824.
- Sheldon, F. H., Slikas, B., Kinnarney, M., Gill, F. B., Zhao, E. & Silverin, B. 1992 DNA-DNA hybridization evidence of phylogenetic relationships among major lineages of *Parus*. *Auk* 109, 173-185.
- Sibley, C. G., Ahlquist, J. E. & Monroe, B. L. 1988 A classification of the living birds of the world based on DNA- DNA hybridization studies. *Auk* 105, 409-423.
- Sibley, C. G. & Monroe, B. L. 1990 *Distribution and Taxonomy of Birds of the World*. New Haven and London: Yale University Press.
- Silva, M. B. & Downing, J. A. 1995 *CRC Handbook of Mammalian Body Masses*. Boca Raton, Florida: CRC Press.
- Stephan, H. 1960 Methodische Studien über den quantitativen Vergleich architektonischer Struktureinheiten des Gehirns. *Zeitschrift für wissenschaftliche Zoologie* 164, 143-172.



- Stephan, H., Frahm, H. & Baron, G. 1981 New and revised data on volumes of brain structures in Insectivores and Primates. *Folia Primatologica* 35, 1-29.
- Swihart, R. 1984 Body size, breeding season length, and life history tactics of lagomorphs. *Oikos* 43, 282-290.
- Viscor, G. & Fuster, J. F. 1987 Relationships between morphological parameters in birds with different flying habits. *Comparative Biochemistry and Physiology A-Physiology* 87:231-249.
- Weigl, R. 2005 *Longevity of mammals in captivity; from the living collections of the world*. Stuttgart: Schweizerbart.
- Wiese, R. J. & Willis, K. 2004 Calculation of longevity and life expectancy in captive elephants. *Zoo Biology* 23, 365-373.
- Yuri, T. & Mindell, D. P. 2002 Molecular phylogenetic analysis of Fringillidae, "New World nine-primaried oscines" (Aves: Passeriformes). *Molecular Phylogenetics and Evolution* 23, 229-243.
